# Supplementary material for: LAMBDA sign can be used as an indicator to predict long-term prognosis of ankle injury: a ten-year follow-up retrospective study based on MRI
Source: Research Square preprint supplement (doi:10.21203/rs.3.rs-8210681/v1), 2025-12-16
Supplement: Supplementary file 1 [file 6fcf3fcf9f215e22e4f0fe8a.docx]

Supplemental Material - Table 5

Table 5. Detailed Spearman Rank Correlation Analysis Between DTJEH and Patient-Reported Outcomes

Analysis A: All Patients (LAMBDA-negative patients recorded as DTJEH = 0 mm)

| **Patient-Reported Outcome** | **Spearman's ρ** | **P Value** | **95% CI** | **Interpretation** |
| --- | --- | --- | --- | --- |
| **Primary Outcome** |  |  |  |  |
| FAOS Score | -0.413 | <0.001** | -0.587, -0.201 | Significant negative correlation |
| **Secondary Outcomes** |  |  |  |  |
| Karlsson Score | -0.360 | 0.001** | -0.544, -0.141 | Significant negative correlation |
| Current Tegner Score | -0.055 | 0.627 | -0.270, 0.166 | No correlation |
| Tegner Decline (ΔTegner) | 0.362 | 0.001** | 0.143, 0.545 | Significant positive correlation |
| VAS Pain Score | 0.160 | 0.158 | -0.063, 0.369 | No correlation |
| Patient Satisfaction | -0.262 | 0.020* | -0.461, -0.043 | Significant negative correlation |
| **Preoperative Measures** |  |  |  |  |
| Pre-injury Tegner Score | 0.287 | 0.010* | 0.070, 0.481 | Significant positive correlation |
| Preoperative FAOS | -0.141 | 0.214 | -0.352, 0.081 | No correlation |
| Preoperative Karlsson | -0.122 | 0.284 | -0.335, 0.100 | No correlation |
| Preoperative VAS | -0.071 | 0.532 | -0.286, 0.150 | No correlation |

Analysis B: LAMBDA-Positive Patients Only (n=46)

| **Patient-Reported Outcome** | **Spearman's ρ** | **P Value** | **95% CI** | **Interpretation** |
| --- | --- | --- | --- | --- |
| **Primary Outcome** |  |  |  |  |
| FAOS Score | -0.171 | 0.257 | -0.451, 0.129 | No correlation |
| **Secondary Outcomes** |  |  |  |  |
| Karlsson Score | -0.109 | 0.472 | -0.398, 0.192 | No correlation |
| Current Tegner Score | -0.024 | 0.876 | -0.318, 0.274 | No correlation |
| Tegner Decline (ΔTegner) | 0.158 | 0.294 | -0.140, 0.433 | No correlation |
| VAS Pain Score | -0.029 | 0.850 | -0.323, 0.269 | No correlation |
| Patient Satisfaction | -0.221 | 0.139 | -0.485, 0.075 | No correlation |
| **Preoperative Measures** |  |  |  |  |
| Pre-injury Tegner Score | 0.141 | 0.350 | -0.155, 0.417 | No correlation |
| Preoperative FAOS | -0.061 | 0.685 | -0.352, 0.237 | No correlation |
| Preoperative Karlsson | -0.021 | 0.887 | -0.314, 0.275 | No correlation |
| Preoperative VAS | -0.096 | 0.525 | -0.384, 0.204 | No correlation |

*p<0.05, **p<0.01

Key Findings:

1. **When LAMBDA-negative patients are included with DTJEH = 0**: Several significant correlations emerge, but these primarily reflect the overall difference between LAMBDA-positive and LAMBDA-negative groups rather than a true dose-response relationship with effusion height.
2. **Among LAMBDA-positive patients only**: No significant correlations were observed between DTJEH and any patient-reported outcomes (P > 0.05 for all measures).
3. **Clinical Interpretation**: The lack of correlation within the LAMBDA-positive cohort suggests that effusion height alone does not predict functional outcomes. This finding challenges the assumption that higher effusion height necessarily indicates greater injury severity or worse prognosis.

Statistical Methods:

1. Spearman rank correlation coefficients were calculated due to non-normal distribution of outcome variables
2. 95% confidence intervals were calculated using Fisher's z-transformation
3. Bonferroni correction was not applied given the exploratory nature of this analysis
4. Sample size for Analysis A: n=79; Analysis B: n=46

Conclusion:

The detailed correlation analysis confirms that DTJEH is not significantly correlated with patient-reported outcomes when analyzed within the LAMBDA-positive cohort. This supports the conclusion that the LAMBDA sign itself, rather than the quantitative measurement of effusion height, is the more clinically relevant prognostic indicator.
